# Supplementary material
Source: publisher figshare collection journal article supplement (https://diabetesjournals.figshare.com/articles/dataset/_/14473791)
Supplement: Supplementary file 1 [file 2]

## Sheet: Table S1
Table S1, related to Figure 1: Clinical data of the subjects analyzed in the study
	Sex (M/F)	Age (years)	BMI	Diagnosis	HbA1c (%)	HbA1c (mmol/mol)	BG (mg/dl)	Hight (cm)	Body weight (kg)
non-diabetic subjects	F	60	24.6194	Idiopathic dilated cardiomyopathy	4.9	30	124	147	53.2
	M	52	20.7347	Rectal cancer	5.8	40	105	175	63.5
	F	51	31.6776	Pulmonary artery thrombosis	5.4	36	216	164	85.2
	M	67	26.7229	Pneumonia	6.3	45	107	164.5	64.6
	M	67	26.8359	Sudden death	5.4	36	110	160	68.7
	F	74	14.6599	Rt. lung cancer	5.8	40	94	161	38
	M	67	25.7	Fuluminant hepatitis	5.6	38	125	183	86.4
	M	82	27.8	ARDS	5.2	33	100	155.5	67
	M	41	17.7	Idiopathic dilated cardiomyopathy	5.3	34	98	178	56.1
	F	71	26.6	Fluminant hepatitis	5.1	32	88	155	64
	M	48	27.1972	Gastric ulcer	not available	not available	not available	170	78.6
	F	53	25	Nephrotic syndrome	5.6	38	105	150	56.3
	F	71	16.9	Amyotrophic lateral sclerosis	5.7	39	90	145.5	35.8
Average		61.8462	24.0114		5.50833	36.75	113.5	162.192	62.8769
SEM		3.32405	1.38234		0.108333	1.19421	9.906	3.27898	4.30358
subjects with type 2 diabetes	F	72	21.0098	Acute myocardial infarction	6.2	44	183	147	45.4
	M	76	26.4381	Infective endocarditis	8.6	70	112	158	66
	F	80	21.2306	Mediastinitis	6.6	49	196	158	53
	M	64	23.737	Bile duct cancer	7.3	56	120	167	66.2
	M	71	19.2394	Sarcoidosis	7.8	62	221	166.6	53.4
Average		72.6	22.331		7.3	56.2	166.4	159.32	56.8
SEM		2.67582	1.25219		0.426615	4.60869	21.5002	3.65546	4.05561
Ttest		0.0767538	0.491726		0.000040**	0.000041**	0.021*	0.62725	0.427455
BMI, body mass index; HbA1c, hemoglobin A1c. *P < 0.05, **P < 0.01
