# Supplementary material
Source: publisher figshare collection journal article supplement (https://diabetesjournals.figshare.com/articles/dataset/_/14473791)
Supplement: Supplementary file 2 [file 2]

## SUPPLEMENTAL FIGURE LEGENDS

### **Figure S1, related to Figure 1: Quantification of proteins in the islets of *db/db* mice, *misty/misty* mice, DIO mice, and lean mice, and immunofluorescence staining of human samples**

(A) Quantification of the immunoblots of MEK1, MEK2, pMEK1/2, AKT and pAKT in the islets of 6, 10 and 14-week-old *db/db* and *misty/misty* mice. \* $P < 0.05$ , \*\* $P < 0.01$ ,  $n = 3$ . All data are represented as mean  $\pm$  SEM.

(B) Quantification of the immunoblots of MEK1, MEK2, pMEK1/2, AKT and pAKT in the islets of DIO mice fed on HFD for 2, 10 and 20 weeks (HFD) and age-matched control mice on NCD (NCD). \* $P < 0.05$ , \*\* $P < 0.01$ ,  $n = 3-4$ . All data are represented as mean  $\pm$  SEM.

(C) Immunofluorescence staining with a pERK1/2-specific antibody (red), an insulin-specific antibody (green) and DAPI (blue) of pancreatic sections obtained from the subjects with or without type 2 diabetes (T2DM and non-DM)

Scale bar, 100  $\mu\text{m}$ .

### **Figure S2, related to Figure 2: Evaluation of MEK1 and MEK2 deletion in islets and other organs obtained from *MIP-Cre/ERT<sup>+</sup>/Mek1<sup>ff</sup>* mice (Tmx+), *Mek2<sup>ko/ko</sup>* mice, $\beta$ *Mek1/2*DKO mice and their controls, and ITTs on DIO $\beta$ *Mek1/2*DKO mice**

(A) Immunoblots of proteins of interest in the islets of the 11- to 12-week-old *MIP-Cre/ERT<sup>+</sup>/Mek1<sup>ff</sup>* and *MIP-Cre/ERT<sup>-</sup>/Mek1<sup>ff</sup>* mice with Tmx injection

(B) Immunoblots of proteins of interest in the islets of the 12-week-old *Mek2<sup>ko/ko</sup>* and *Mek2<sup>wt/wt</sup>* mice

(C) Quantification of the immunoblots of ERK1/2 and pERK1/2 in the islets of 14-week-old  $\beta$ *Mek1/2*DKO and Tmx<sup>-</sup> control mice. \**P* < 0.05, *n* = 3. All data are represented as mean  $\pm$  SEM.

(D) Immunoblots of MEK1 in hypothalami, livers, epididymal white adipose tissues (eWATs) and muscles from  $\beta$ *Mek1/2*DKO and Tmx<sup>-</sup> control mice

(E-G) Blood glucose levels after intraperitoneal injection of insulin in  $\beta$ *Mek1/2*DKO and Tmx<sup>-</sup> control mice fed on HFD for 6 weeks (1.0 U/kg-BW) (E), 12 weeks (1.5 U/kg-BW) (F), and 18 weeks (1.5 U/kg-BW) (G). *n* = 7-10. All data are represented as mean  $\pm$  SEM.

**Figure S3, related to Figure 2: The metabolic features of *Mek2<sup>ko/ko</sup>* mice fed on HFD**

(A - C) Profiles of *Mek2<sup>ko/ko</sup>*, *Mek2<sup>wt/ko</sup>* and *Mek2<sup>wt/wt</sup>* mice fed on HFD: body weight (A), blood glucose levels (B), and plasma insulin concentrations (C). *n* = 12-17. All data are represented as mean  $\pm$  SEM.

(D and E) Blood glucose levels (D) and area under the blood concentration time curves (AUC) (E) after intraperitoneal injection of glucose (1.0 g/kg-BW) in *Mek2<sup>ko/ko</sup>*, *Mek2<sup>wt/ko</sup>* and *Mek2<sup>wt/wt</sup>* mice fed on HFD for 16 weeks. *n* = 6-7. All data are represented as mean  $\pm$  SEM.

(F and G) Plasma insulin concentrations (F) and area under the plasma concentration

time curves (AUC) (G) after intraperitoneal injection of glucose (1.0 g/kg-BW) in *Mek2<sup>ko/ko</sup>*, *Mek2<sup>wt/ko</sup>* and *Mek2<sup>wt/wt</sup>* mice fed on HFD for 16 weeks. *n* = 6-7. All data are represented as mean ± SEM.

(H and I) Blood glucose levels (H) and area under the blood concentration time curves (AUC) (I) after intraperitoneal injection of insulin (1.5 U/kg-BW) in *Mek2<sup>ko/ko</sup>*, *Mek2<sup>wt/ko</sup>* and *Mek2<sup>wt/wt</sup>* mice fed on HFD for 16-18 weeks. *n* = 12-17. All data are represented as mean ± SEM.

**Figure S4, related to Figure 2: Assessment of the effects of Tmx injection on DIO mice**

(A and B) Profiles of *Mek1<sup>ff</sup>Mek2<sup>ko/ko</sup>* mice with or without Tmx injection fed on HFD: body weight (A) and blood glucose levels (B). *n* = 9-11. All data are represented as mean ± SEM.

(C-E) Blood glucose levels after intraperitoneal injection of glucose (1.0 g/kg-BW) in *Mek1<sup>ff</sup>Mek2<sup>ko/ko</sup>* mice fed on HFD for 6 weeks (C), 12 weeks (D) and 19 weeks (E) with or without Tmx injection. *n* = 9-11. All data are represented as mean ± SEM.

(F-H) Blood glucose levels after intraperitoneal injection of insulin in *Mek1<sup>ff</sup>Mek2<sup>ko/ko</sup>* mice with or without Tmx injection fed on HFD for 6 weeks (1.0 U/kg-BW) (F), 12 weeks (1.5 U/kg-BW) (G) and 18 weeks (1.5 U/kg-BW) (H). *n* = 9-11. All data are represented as mean ± SEM.

(I) Plasma insulin concentrations after intraperitoneal injection of glucose (3.0 g/kg-BW) in *Mek1<sup>ff</sup>Mek2<sup>ko/ko</sup>* mice fed on HFD for 22 weeks with or without Tmx

injection.  $n = 9-11$ . All data are represented as mean  $\pm$  SEM.

**Figure S5, related to Figure 3: Immunohistochemical staining of E14.5 mouse pancreatic sections, ratio of Gcg<sup>+</sup> area to insulin<sup>+</sup> area in  $\beta$ Mek1/2DKO islets, and gene-expression analyses of *Gcg* and *Arx* in the islets from  $\beta$ Mek1/2DKO mice**

(A) Immunohistochemical staining of E14.5 mouse pancreatic sections with a Sox9-specific antibody (red), an Ngn3-specific antibody (green) and DAPI (blue). Scale bar, 10  $\mu$ m

(B) Immunohistochemical staining with an insulin-specific antibody (green), Gcg-specific antibody (red) and DAPI (blue) (Left), quantified ratios of Gcg<sup>+</sup> area to insulin<sup>+</sup> area (Middle) and quantified proportions of Gcg<sup>+</sup> area in whole pancreas (Right) assessed in the pancreatic sections from  $\beta$ Mek1/2DKO and Tmx<sup>-</sup> control mice fed on HFD for 18 weeks. The proportion of Gcg<sup>+</sup> area in whole pancreas was calculated from the ratio of Gcg<sup>+</sup> to insulin<sup>+</sup> area and the proportion of insulin<sup>+</sup> area in whole pancreas.  $*P < 0.05$ ,  $n = 7$ ; Scale bar, 50  $\mu$ m. All data are represented as mean  $\pm$  SEM.

(C) Levels of expression of *Gcg* and *Arx* in the islets from  $\beta$ Mek1/2DKO and Tmx<sup>-</sup> control mice fed on NCD (NCD) or HFD for indicated periods.  $*P < 0.05$ ,  $n = 4-9$ . All data are represented as mean  $\pm$  SEM.

**Figure S6, related to Figure 4 and 5: Insulin contents of isolated islets from  $\beta$ Mek1/2DKO mice and Tmx<sup>-</sup> control mice fed on HFD or NCD**

(A) Insulin contents per islet isolated from  $\beta$ *Mek1*/2DKO and Tmx<sup>-</sup> control mice fed on HFD for 24-25 weeks. After incubating in recovery buffer over night, we pooled 6 isolated islets and maintained them in KRB buffer with 0.2% BSA supplemented with 2.8 mM glucose for 1.5 hours at 37°C. Subsequently, insulin was extracted from the islets by sonication and subsequent incubation in acid ethanol at 4°C. Insulin contents were measured using ELISA kits (Morinaga).

$n = 5$  (the quadruple of 6 pooled islets was counted as  $n = 1$ ). All data are represented as mean  $\pm$  SEM.

(B) DNA contents per islet isolated from  $\beta$ *Mek1*/2DKO and Tmx<sup>-</sup> control mice fed on HFD for 24-25 weeks. After incubating in recovery buffer over night, we pooled 6 isolated islets, washed them, and DNAs were extracted from the pooled islets using Tissue Genomic DNA Extraction Mini Kit (Chiyoda Science).

$n = 5$  (the quadruple of 6 pooled islets was counted as  $n = 1$ ). All data are represented as mean  $\pm$  SEM.

(C) Insulin contents normalized by DNA contents of islet isolated from  $\beta$ *Mek1*/2DKO and Tmx<sup>-</sup> control mice fed on HFD for 24-25 weeks.

$n = 5$ . All data are represented as mean  $\pm$  SEM.

(D) Insulin contents per islet isolated from 14- to 15-week-old  $\beta$ *Mek1*/2DKO and Tmx<sup>-</sup> control mice fed on NCD

$n = 6-7$  (the triplicate of 6 pooled islets was counted as  $n = 1$ ). All data are represented as mean  $\pm$  SEM.

(E) DNA contents per islet isolated from 14- to 15-week-old  $\beta$ *Mek1*/2DKO and Tmx<sup>-</sup>

control mice fed on NCD

$n = 6-7$  (the triplicate of 6 pooled islets was counted as  $n = 1$ ). All data are represented as mean  $\pm$  SEM.

(F) Insulin contents normalized by DNA contents of islet isolated from 14- to 15-week-old  $\beta$ *Mek1/2*DKO and Tmx<sup>-</sup> control mice fed on NCD

$n = 6-7$ . All data are represented as mean  $\pm$  SEM.

**Figure S7, related to Figure 5: Metabolic and histological analyses on  $\beta$ *Mek1/2*DKO mice and *Mek2*<sup>ko/ko</sup> mice fed on NCD, and assessment of the effects of Tmx injection on NCD mice**

(A) Blood glucose levels after intraperitoneal injection of insulin (1.0 U/kg-BW) in 11-week-old  $\beta$ *Mek1/2*DKO and Tmx<sup>-</sup> control mice fed on NCD.  $n = 6-7$ . All data are represented as mean  $\pm$  SEM.

(B) Plasma human insulin levels after intraperitoneal injection of insulin (1.0 U/kg-BW) in 11-week-old  $\beta$ *Mek1/2*DKO and Tmx<sup>-</sup> control mice fed on NCD.  $n = 8-9$ . All data are represented as mean  $\pm$  SEM.

(C) Proportions of islets in whole pancreas assessed in the pancreatic sections from  $\beta$ *Mek1/2*DKO and Tmx<sup>-</sup> control mice fed on NCD. Four whole pancreatic sections per animal (400  $\mu$ m apart) stained with HE or aldehyde fuchsin were used for the analyses.

\* $P < 0.05$ ,  $n = 4-9$ . All data are represented as mean  $\pm$  SEM.

(D) Number of islets with a cross-sectional area of interest in the pancreas sections from 23-week-old  $\beta$ *Mek1/2*DKO and Tmx<sup>-</sup> control mice fed on NCD. The statistical

difference was determined for the pooled counts/mm<sup>2</sup> of the upper two clusters. \* $P < 0.05$ ,  $n = 4$ . All data are represented as mean  $\pm$  SEM.

(E - G) Profiles of 11-week-old *Mek2*<sup>ko/ko</sup> and *Mek2*<sup>wt/wt</sup> mice fed on NCD: body weight (E), blood glucose levels (F) and plasma insulin levels (G).  $n = 8$ . All data are represented as mean  $\pm$  SEM.

(H and I) Blood glucose levels (H) and area under the blood concentration time curves (AUC) (I) after intraperitoneal injection of insulin (1.0 U/kg-BW) in the 11-week-old *Mek2*<sup>ko/ko</sup> and *Mek2*<sup>wt/wt</sup> mice fed on NCD.  $n = 6-8$ . All data are represented as mean  $\pm$  SEM.

(J) Plasma insulin concentrations after intraperitoneal injection of glucose (3.0 g/kg-BW) in the 12-week-old *Mek2*<sup>ko/ko</sup> and *Mek2*<sup>wt/wt</sup> mice on NCD.  $n = 8$ . All data are represented as mean  $\pm$  SEM.

(K and L) Blood glucose levels (K) and area under the blood concentration time curves (AUC) (L) after intraperitoneal injection of glucose (2.0 g/kg-BW) in the 18-week-old *Mek2*<sup>ko/ko</sup> and *Mek2*<sup>wt/wt</sup> mice fed on NCD.  $n = 7-8$ . All data are represented as mean  $\pm$  SEM.

(M and N) Plasma insulin concentrations (M) and area under the plasma concentration time curves (AUC) (N) after intraperitoneal injection of glucose (2.0 g/kg-BW) in the 18-week-old *Mek2*<sup>ko/ko</sup> and *Mek2*<sup>wt/wt</sup> mice on NCD.  $n = 7-8$ . All data are represented as mean  $\pm$  SEM.

(O) Plasma insulin concentrations after intraperitoneal injection of glucose (3.0 g/kg-BW) in the 11- to 12-week-old *Mek1*<sup>f/f</sup>*Mek2*<sup>ko/ko</sup> mice fed on NCD with or without

Tmx injection.  $n = 9$ . All data are represented as mean  $\pm$  SEM.

**Figure S8 related to Figure 6: Gene-expression analyses on exocytotic molecules in  $\beta$ Mek1/2DKO islets and GO analyses of the molecules with significantly less-phosphorylated site(s) in  $\beta$ Mek1/2DKO islets**

(A) Levels of expression of *Snap25*, *Pclo*, *Itpr3*, *Rab37*, *Syt14*, *Rims2*, *Stx1a*, *Vamp2* and *Rab27a* in the islets from  $\beta$ Mek1/2DKO and Tmx<sup>-</sup> control mice fed on NCD.  $n = 7-9$ .

All data are represented as mean  $\pm$  SEM.

(B) The results of GO analyses of the 190 molecules harboring the 241 sites which were phosphorylated at significantly lower levels in  $\beta$ Mek1/2DKO mouse islets than in the Tmx<sup>-</sup> control mouse islets ( $P$  value  $< 0.05$ , fold change  $< -1.5$ ). Top 10 GO terms in the GOTERM\_CC\_DIRECT and UP\_KEYWORD categories were shown with raw  $P$  values. CC stands for cellular component.

**Figure S9 related to Figure 7: The GO analyses based on phosphoproteomic data of Mincl4 cells**

(A) The results of GO analyses of the 282 molecules harboring the 373 sites which were phosphorylated at significantly higher levels in HG condition than in LG condition ( $P$  value  $< 0.05$ , fold change  $> 1.5$ ). Top 10 GO terms in the GOTERM\_CC\_DIRECT and UP\_KEYWORD categories were shown with raw  $P$  values.

(B) The results of GO analyses of the 112 molecules harboring the 155 phosphosites with significantly higher phosphorylation levels in HG condition compared to both in



LG and HGi conditions ( $P$  value  $< 0.05$ ). Top 10 GO terms in the GOTERM\_CC\_DIRECT and UP\_KEYWORD categories were shown with raw  $P$  values.
