# Supplementary material
Source: publisher figshare collection journal article supplement (https://diabetesjournals.figshare.com/articles/dataset/_/14473791)
Supplement: Supplementary file 8 [file 2]

**Table S2, related to Figure 7: 21 overlapping sites of 15 proteins commonly identified both in the less-phosphorylated sites in  $\beta$ Mek1/2DKO islets and in the 155 phosphosites identified as the most-phosphorylated sites in HG condition in MINcl4 cell experiments**

|                                                                    |
|--------------------------------------------------------------------|
| Protein ID (Uniprot)_                                              |
| Gene name_                                                         |
| Phosphorylated residue_                                            |
| Number of phosphosite(s) observed in the identified phosphopeptide |
| F6ZDS4_ <i>Tpr</i> _S2223_1                                        |
| F6ZDS4_ <i>Tpr</i> _T2205_1                                        |
| O88792_ <i>Fllr</i> _S288_1                                        |
| P18653_ <i>Rps6ka1</i> _S369_1                                     |
| P28028_ <i>Braf</i> _T790_1                                        |
| P59759_ <i>Mkl2</i> _S66_1                                         |
| Q3UQ44_ <i>Iqgap2</i> _S16_1                                       |
| Q5DTT2_ <i>Psd</i> _S283_1                                         |
| Q6PEM6_ <i>Gramd3</i> _S62_1                                       |
| Q63844_ <i>Mapk3</i> _T203_1                                       |
| Q8BG30_ <i>Nelfa</i> _T277_1                                       |
| Q8K1N2_ <i>Phldb2</i> _S465_1                                      |
| Q8VDZ4_ <i>Zdhhc5</i> _S409_1                                      |
| Q9EQN3_ <i>Tsc22d4</i> _S271_1                                     |
| A2A7S8_ <i>Kiaa1522</i> _S883_2                                    |
| A2A7S8_ <i>Kiaa1522</i> _S886_2                                    |
| Q6PEM6_ <i>Gramd3</i> _S7_2                                        |
| Q6PEM6_ <i>Gramd3</i> _S8_2                                        |
| Q6PEM6_ <i>Gramd3</i> _S9_2                                        |
| Q924A2_ <i>Cic</i> _S2275_2                                        |
| Q924A2_ <i>Cic</i> _S2284_2                                        |
