# Supplementary material
Source: publisher figshare collection journal article supplement (https://diabetesjournals.figshare.com/articles/dataset/_/14473791)

Figure S1, related to Figure 1

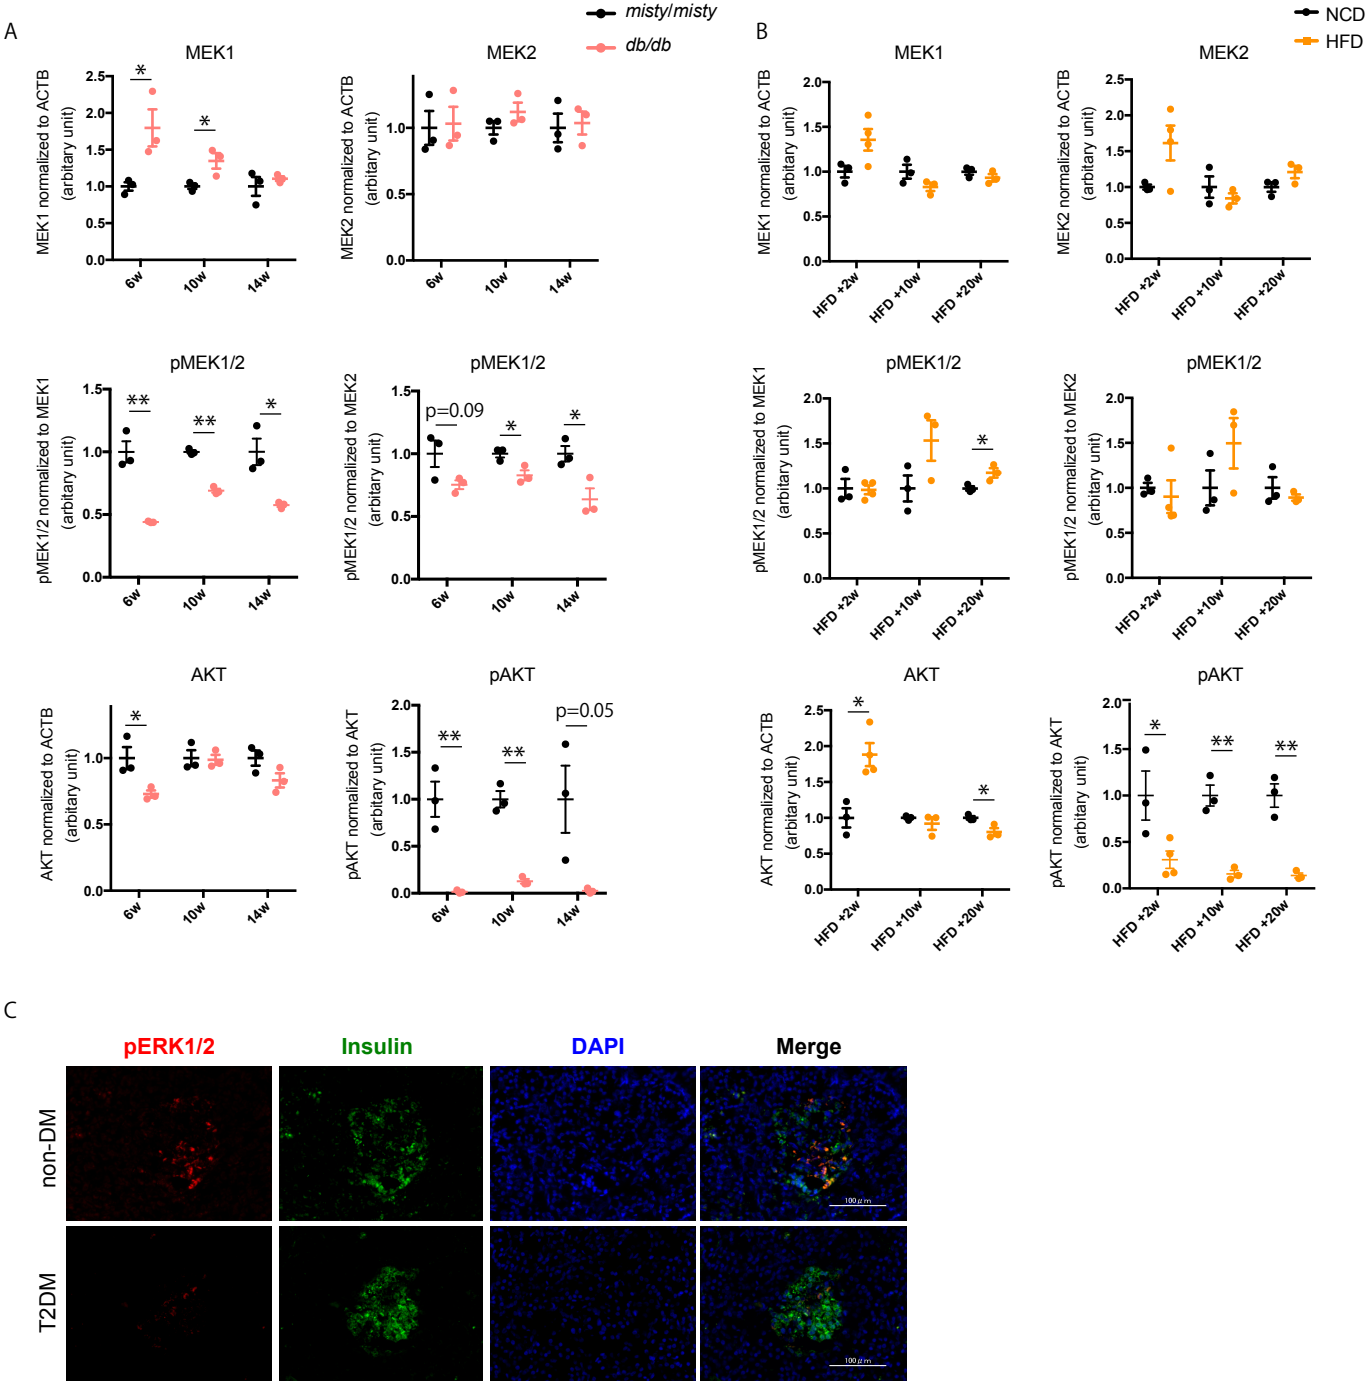

Supplement: Supplementary file 1 [file 2]

Figure S4, related to Figure 2

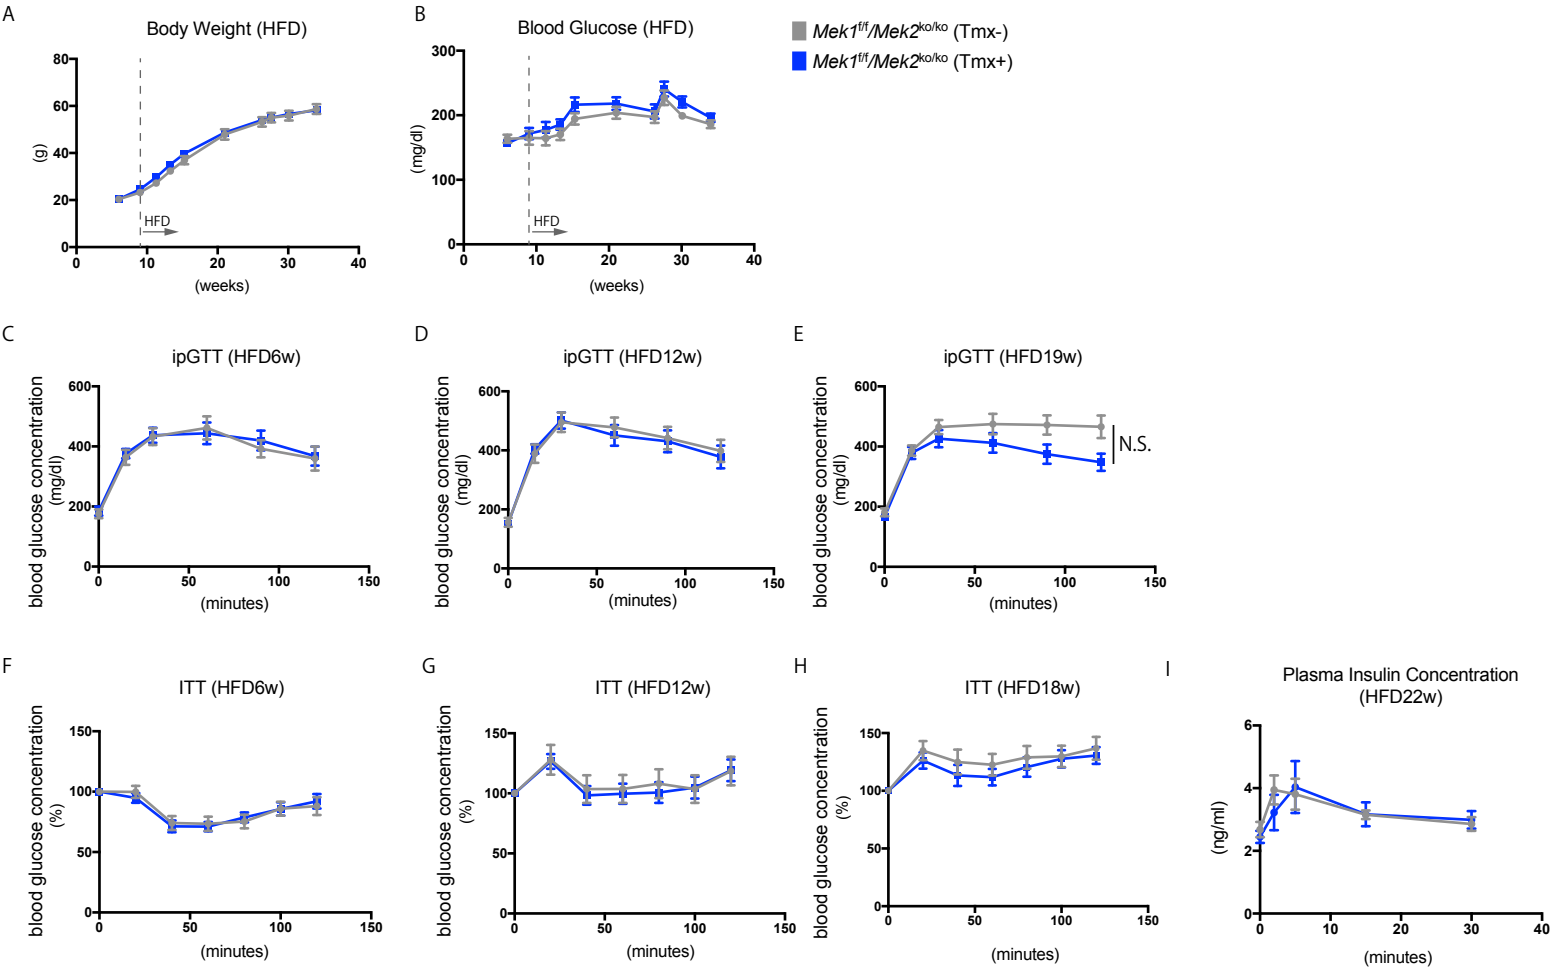

Supplement: Supplementary file 3 [file 2]

Figure S6, related to Figure 4 and 5

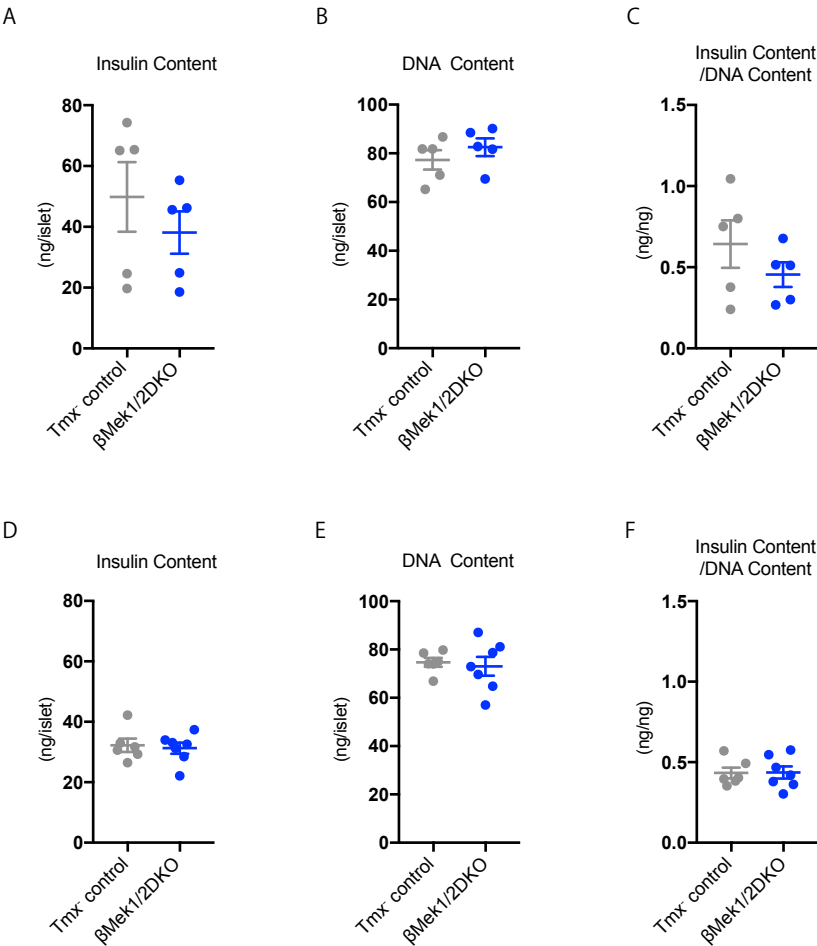

Supplement: Supplementary file 4 [file 2]

Figure S2, related to Figure 2

A

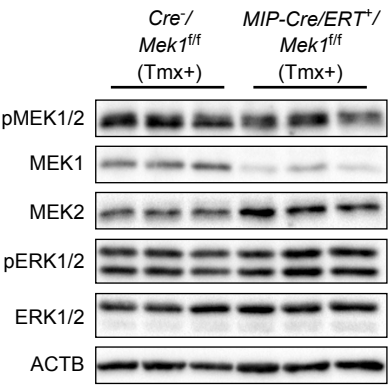

B

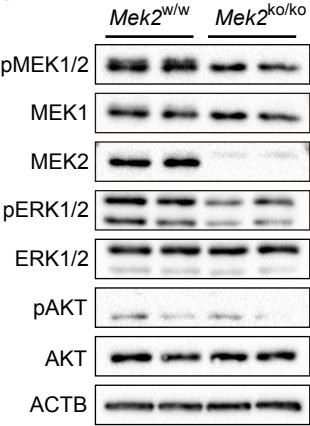

C

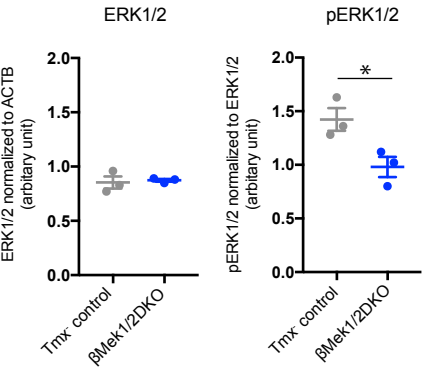

D

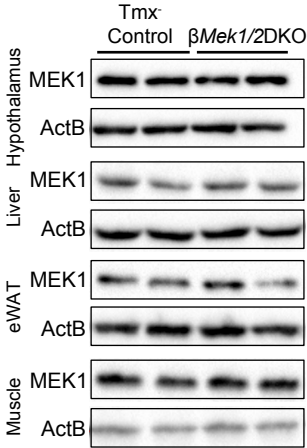

E

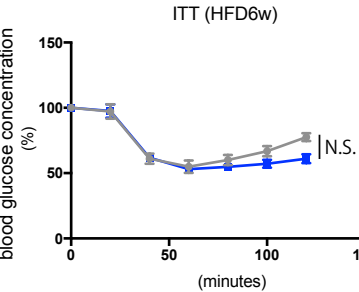

F

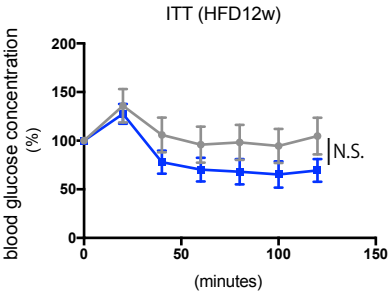

G

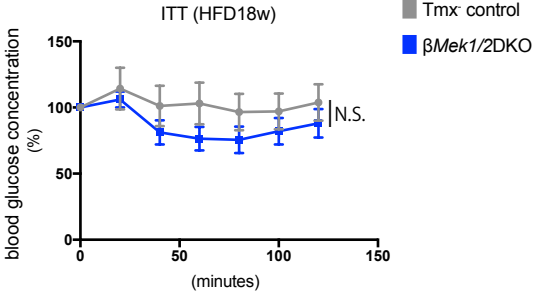

Supplement: Supplementary file 5 [file 2]

Figure S3, related to Figure 2

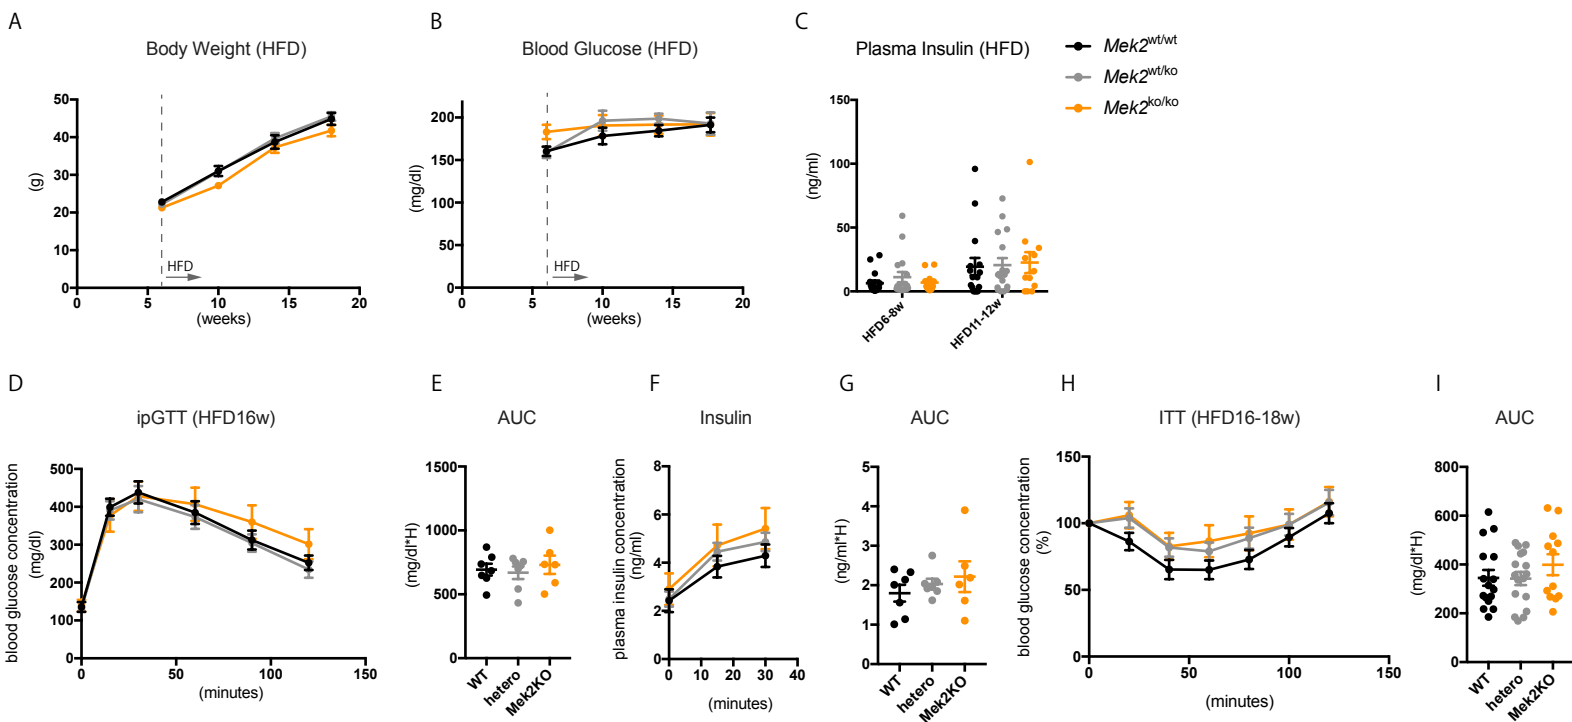

Supplement: Supplementary file 6 [file 2]

Figure S5, related to Figure 3

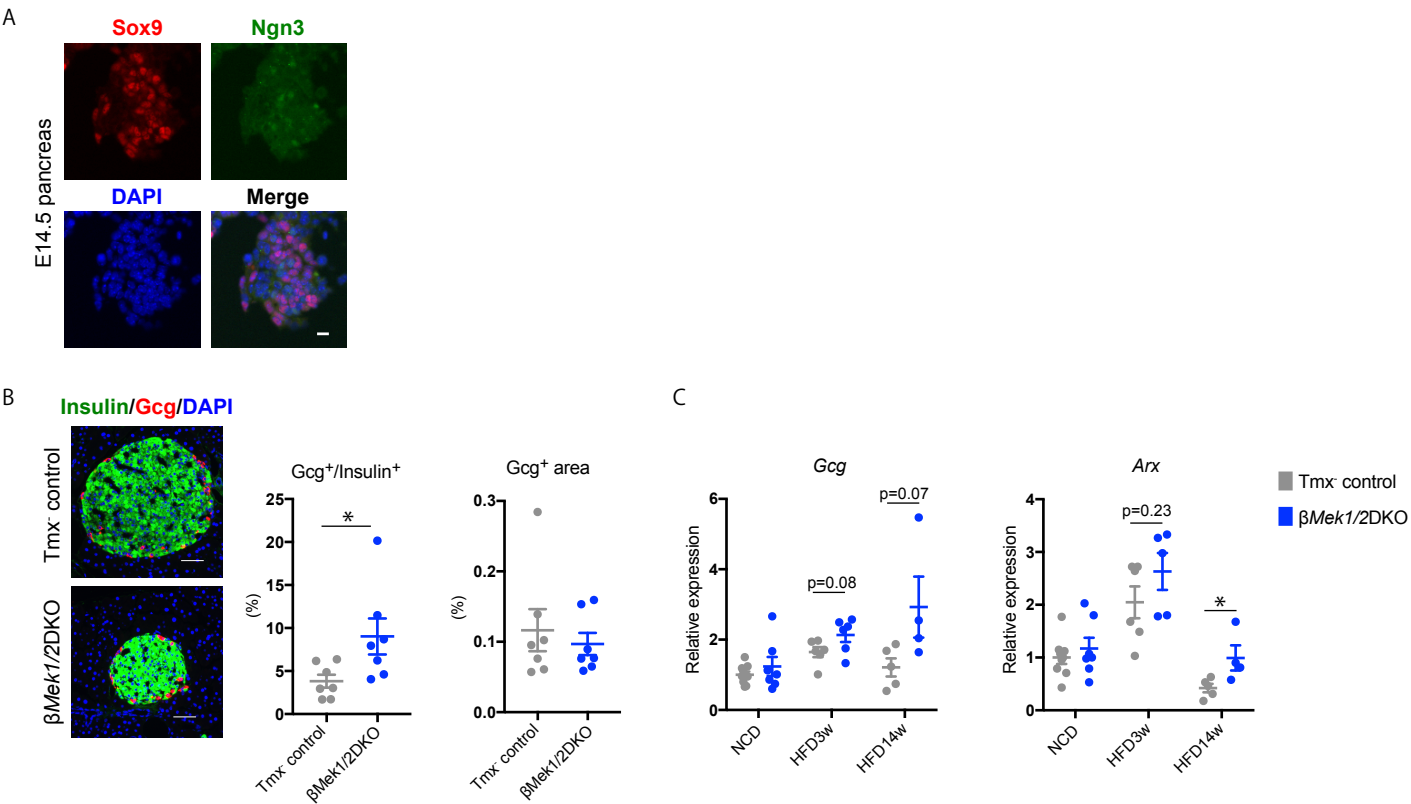

Supplement: Supplementary file 7 [file 2]

Figure S7, related to Figure 5

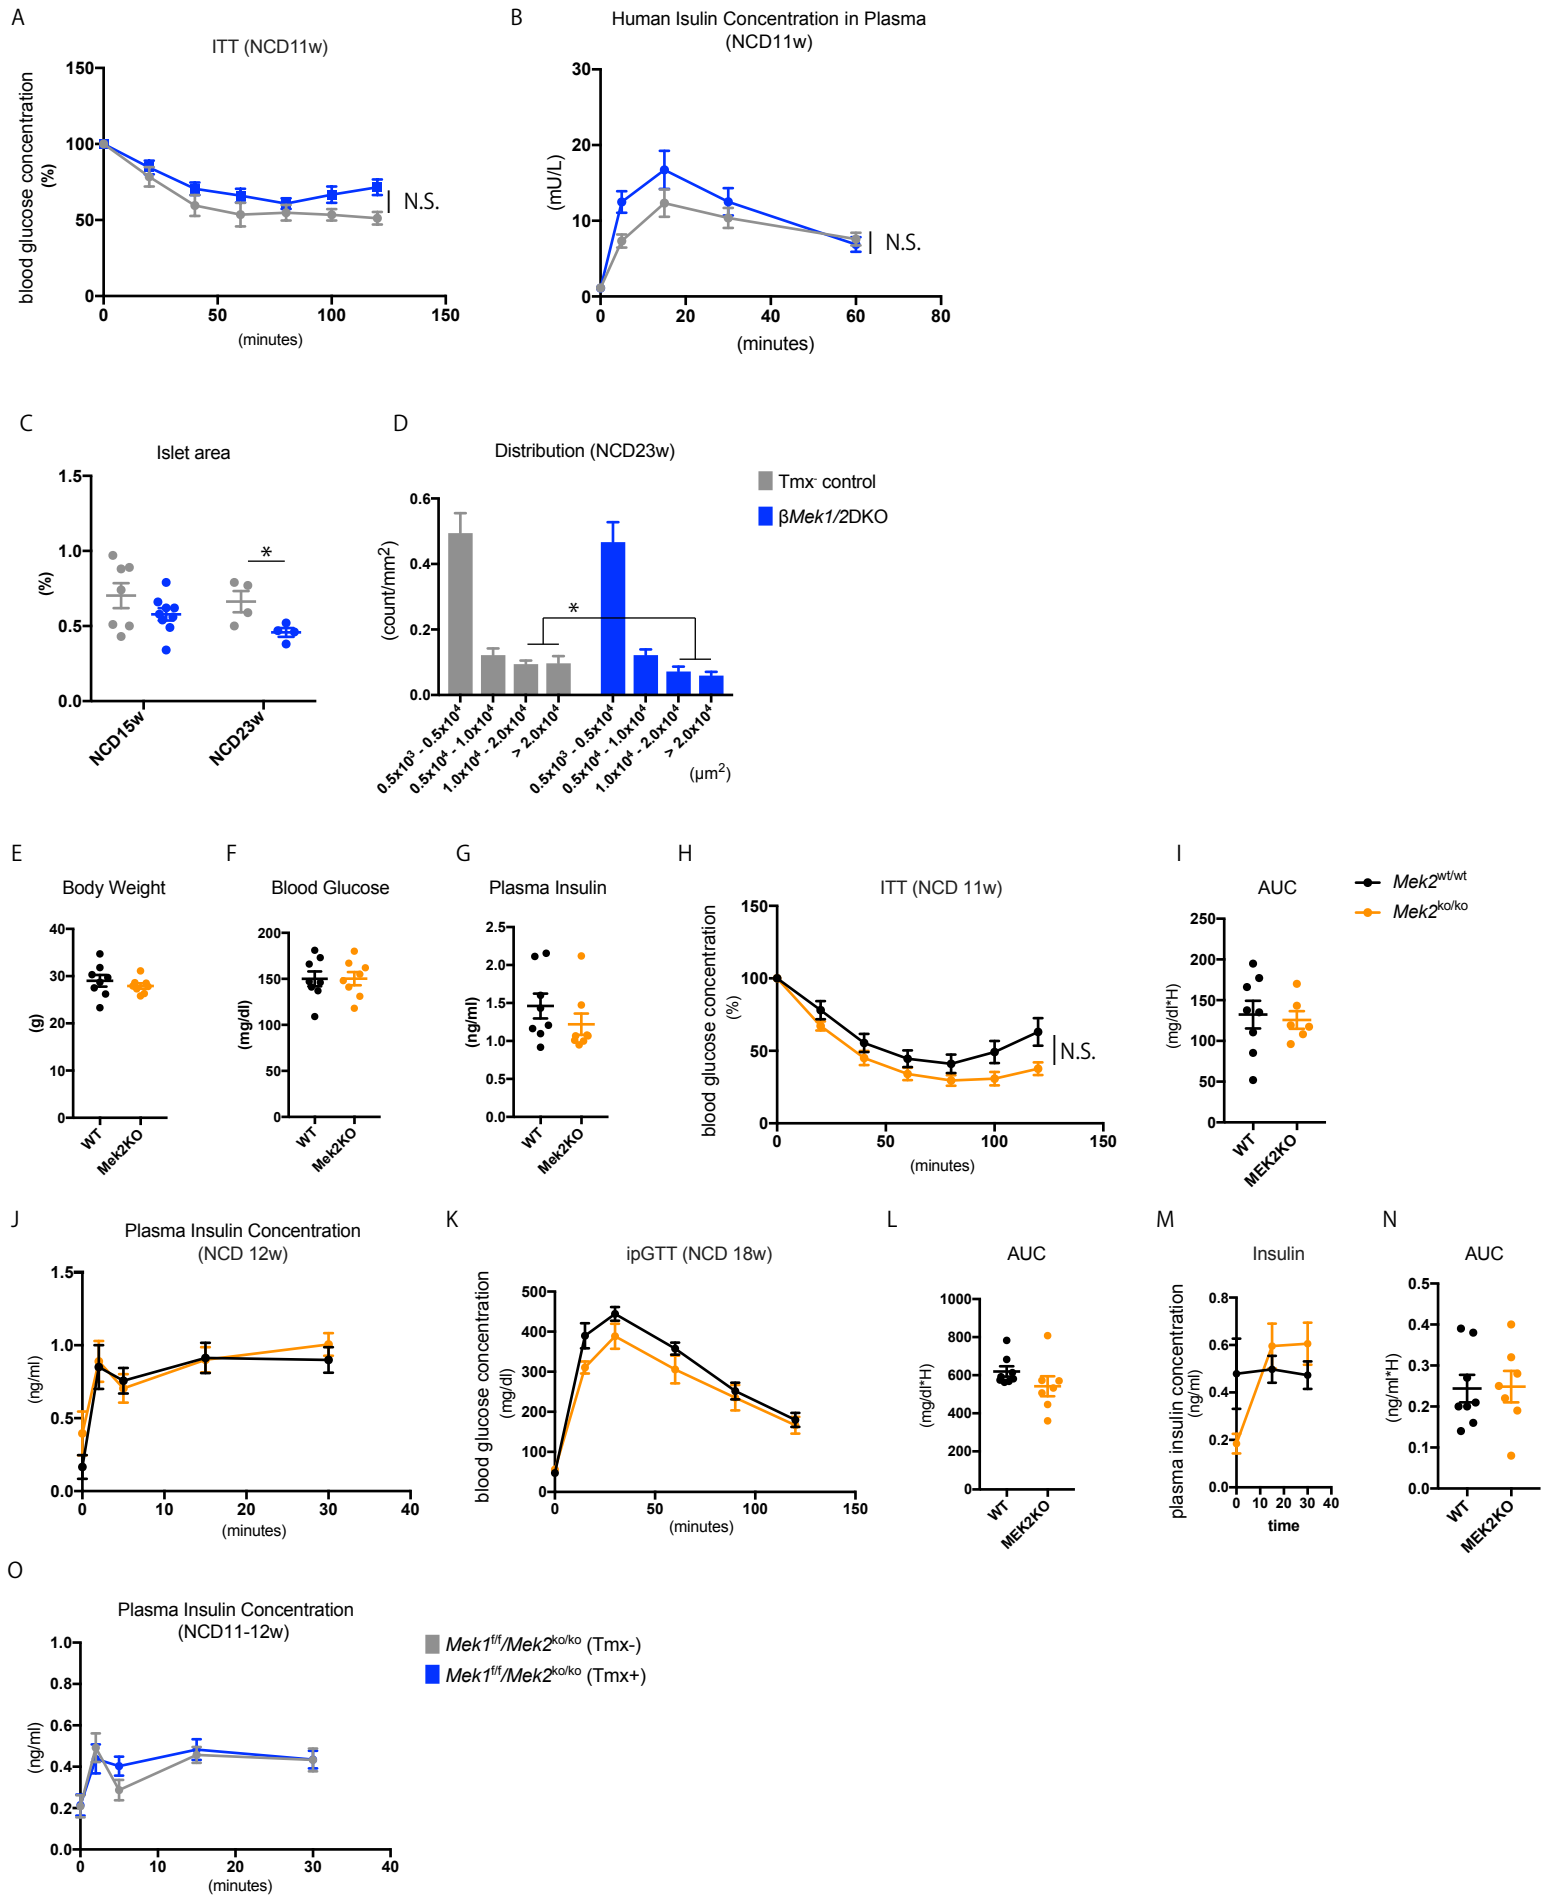

Supplement: Supplementary file 9 [file 2]

Figure S8, related to Figure 6

A

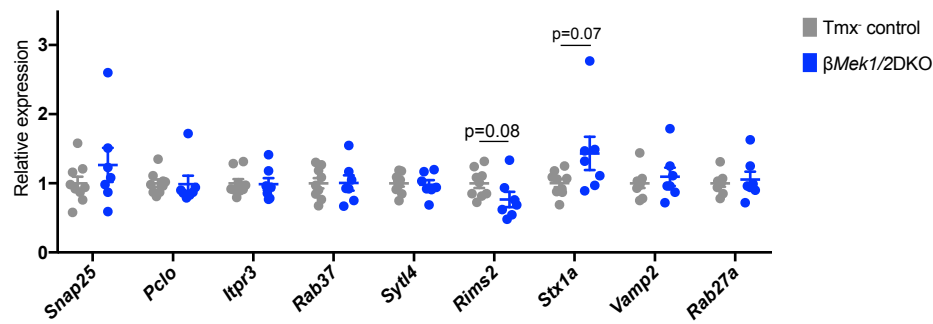

B

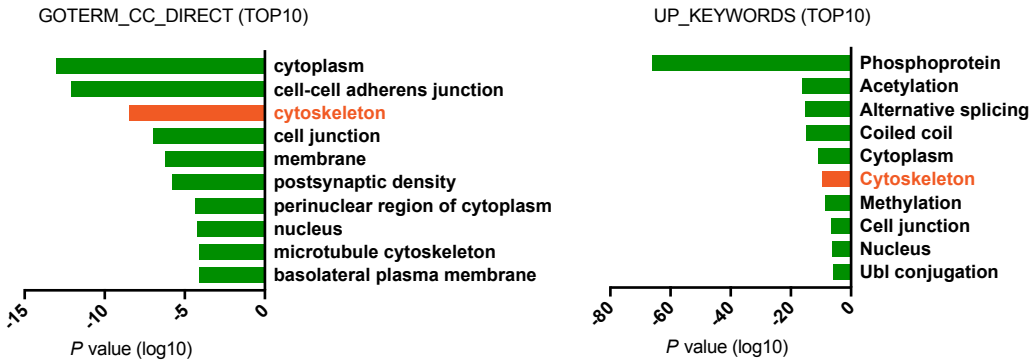

Supplement: Supplementary file 10 [file 2]

Figure S9, related to Figure 7

A

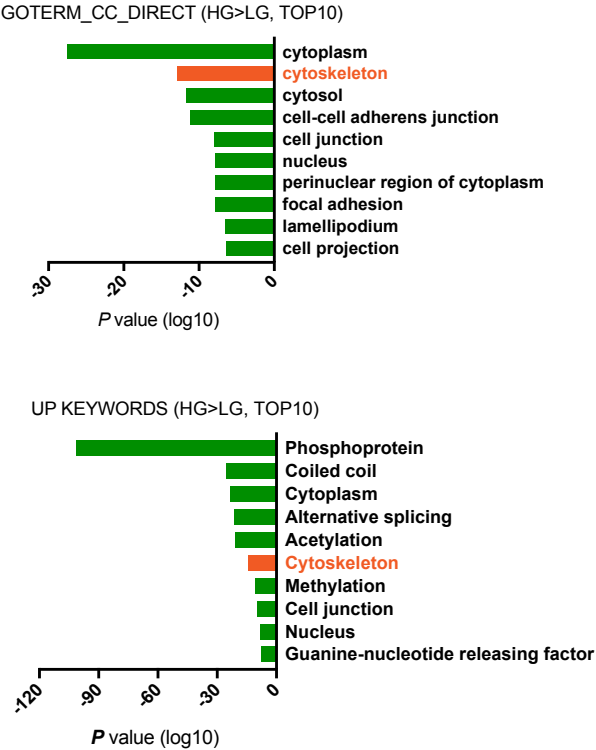

B

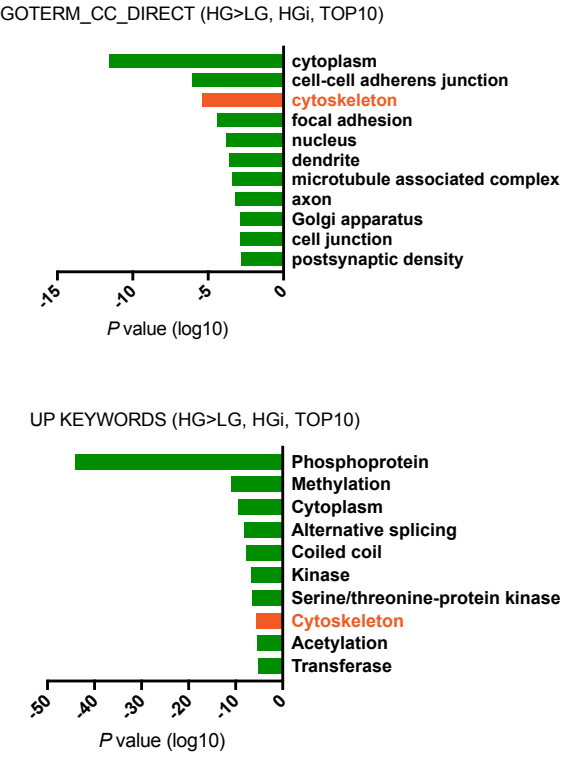

Supplement: Supplementary file 11 [file 2]
